# Supplementary material
Source: publisher figshare collection journal article supplement (https://future-science-group.figshare.com/ndownloader/files/20270934)
Supplement: Supplementary file 1 [file 20270934]

## Supplementary Information

Article title: A rapid approach to profiling diverse fungal communities using Oxford's MinION™ nanopore sequencer

**Supplementary Table 2** Amount of Operational Taxonomic Units (OTUs) before and after filtering. For the mock libraries (A, B, and C). OTUs that were chimeric were removed, and OTUs that matched ≤95% to one of the mock community members were considered to be a weak consensus match and were also removed.

| **Barcoded Library** | **Similarity Cut-off (%)** | **OTUs before filtering** | **OTUs after filtering** |
| --- | --- | --- | --- |
| Mock A | 92 | 61 | 41 |
| Mock A | 90 | 83 | 51 |
| Mock A | 88 | 67 | 37 |
| Mock B | 92 | 61 | 41 |
| Mock B | 90 | 70 | 48 |
| Mock B | 88 | 61 | 38 |
| Mock C | 92 | 53 | 41 |
| Mock C | 90 | 65 | 38 |
| Mock C | 88 | 58 | 36 |
